# Supplementary material for: CpG Type A Induction of an Early Protective Environment in Experimental Multiple Sclerosis
Source: Hindawi journal article supplement (doi:10.1155/2017/1380615), 2017-01-01
Supplement: f1 [file 1380615.f1.pdf]

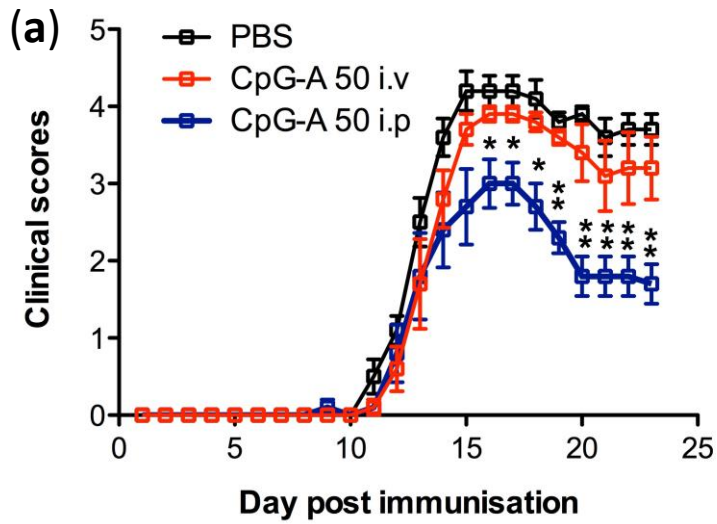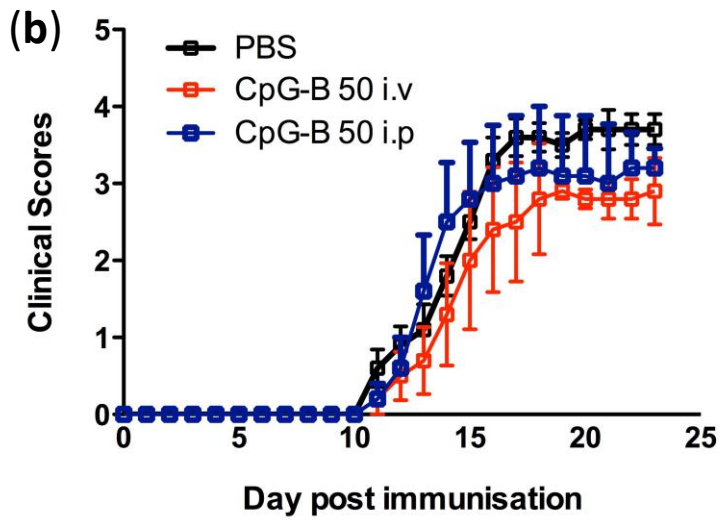

Supp Figure 1
